# Supplementary material
Source: Research Square preprint supplement (doi:10.21203/rs.3.rs-9531640/v1)
Supplement: Supplementary file 1 [file 5e38d7008265a3b6b0edfbf8.docx]

Supplementary Material

**Table Caption**

**Table S1. Disease severity grading criteria for tobacco mosaic virus disease**

**Note:** Disease severity was assessed at the individual plant level according to GB/T 23222–2008.

**Table S2. Routine chemical quality requirements for high-quality flue-cured tobacco in Yunnan Province (Q/YZY 1-2009).**

**Table S3. Incidence and disease index of tobacco mosaic virus disease under different intercropping treatments.**

**Note:** Values are presented as mean ± standard deviation (SD), n = 3. Different lowercase letters within the same row indicate significant differences among treatments at *P* < 0.05. C, flue-cured tobacco monoculture; CG, tobacco–garlic intercropping; CO, tobacco–onion intercropping; CW, tobacco–Chinese chive intercropping.

**Table S4. Topological properties of bacterial and fungal co-occurrence networks in tobacco rhizosphere soil.**

**Note:** Nodes represent the number of microbial taxa included in the co-occurrence network. Edges represent significant correlations among taxa. Positive and negative correlations indicate the proportions of positive and negative associations, respectively. Network density reflects the overall connectivity of the network, and modularity indicates the degree of network compartmentalization.

**Table S1**

| **Disease severity grade** | **Description of symptoms** |
| --- | --- |
| 0 | The whole plant was asymptomatic. |
| 1 | Vein clearing or slight mosaic symptoms appeared on the heart leaves, with no obvious plant dwarfing. |
| 3 | Mosaic symptoms occurred on less than one-third of the leaves, with no obvious leaf deformation; or the diseased plant height was greater than three-fourths of that of healthy plants. |
| 5 | Mosaic, leaf deformation or main-vein necrosis occurred on one-third to one-half of the leaves; or the diseased plant height was two-thirds to three-fourths of that of healthy plants. |
| 7 | Mosaic, leaf deformation or lateral-vein necrosis occurred on one-half to two-thirds of the leaves; or the diseased plant height was one-half to two-thirds of that of healthy plants. |
| 9 | Mosaic, deformation or necrosis occurred throughout the whole plant; or the diseased plant height was less than one-half of that of healthy plants. |

**Table S2**

| **Indicator** | **Reference range or requirement** |
| --- | --- |
| Total sugar (%) | 24–33 |
| Reducing sugar (%) | 20–28 |
| Nicotine (%) | 2.0–3.0 |
| Total nitrogen (%) | 1.5–2.4 |
| Chloride (%) | 0.1–0.6 |
| Potassium (%) | >1.7 |
| Potassium-to-chloride ratio | ≥8 |

**Table S3**

| **Indicator** | **Week** | **C** | **CG** | **CO** | **CW** |
| --- | --- | --- | --- | --- | --- |
| Disease incidence (%) | 1 | 8.33 ± 0.83a | 0.00 ± 0.00c | 4.17 ± 0.21b | 4.17 ± 0.21b |
| 2 | 14.58 ± 1.46a | 0.00 ± 0.00d | 6.25 ± 0.31c | 8.33 ± 0.42b |
| 3 | 25.00 ± 2.50a | 10.42 ± 1.04c | 12.50 ± 0.63c | 18.75 ± 0.94b |
| 4 | 18.75 ± 1.88a | 6.25 ± 0.63b | 16.67 ± 0.83a | 18.75 ± 0.94a |
| 5 | 47.92 ± 4.79a | 47.92 ± 4.79a | 39.58 ± 1.98b | 47.92 ± 2.40a |
| 6 | 89.58 ± 8.96a | 64.58 ± 6.46b | 68.75 ± 3.44a | 68.75 ± 3.44a |
| Disease index | 1 | 3.70 ± 0.37a | 0.00 ± 0.00d | 0.93 ± 0.09b | 0.46 ± 0.01c |
| 2 | 2.55 ± 0.25a | 0.00 ± 0.00c | 2.08 ± 0.21b | 2.31 ± 0.05ab |
| 3 | 6.94 ± 0.69a | 2.08 ± 0.06c | 2.78 ± 0.28c | 4.86 ± 0.10b |
| 4 | 3.94 ± 0.39b | 1.62 ± 0.05c | 6.94 ± 0.69a | 7.64 ± 0.15a |
| 5 | 15.05 ± 1.51a | 7.64 ± 0.23c | 6.71 ± 0.67c | 10.42 ± 0.21b |
| 6 | 21.06 ± 2.11a | 14.58 ± 0.44b | 18.75 ± 1.88a | 18.75 ± 0.38a |

**Table S4**

| **Community** | **Treatment** | **Nodes** | **Edges** | **Positive correlations (%)** | **Negative correlations (%)** | **Network density** | **Modularity** |
| --- | --- | --- | --- | --- | --- | --- | --- |
| Bacteria | C | 50 | 397 | 54.16 | 45.84 | 0.324 | 0.650 |
| CG | 50 | 368 | 62.50 | 37.50 | 0.300 | 0.642 |
| CO | 50 | 412 | 52.43 | 47.57 | 0.336 | 0.606 |
| CW | 50 | 398 | 50.50 | 49.50 | 0.325 | 0.646 |
| Fungi | C | 50 | 401 | 51.87 | 48.13 | 0.327 | 0.634 |
| CG | 50 | 516 | 57.75 | 42.25 | 0.421 | 0.496 |
| CO | 50 | 424 | 50.71 | 49.29 | 0.346 | 0.558 |
| CW | 50 | 393 | 56.23 | 43.77 | 0.321 | 0.662 |

Figure Captions

**Fig. S1 Principal coordinate analysis (PCoA) of bacterial community structure in tobacco rhizosphere soil.**

Principal coordinate analysis (PCoA) of bacterial communities was performed at the OTU level based on UniFrac distance. Each point represents one biological replicate. Different colours represent different treatments. C, flue-cured tobacco monoculture; CG, tobacco–garlic intercropping; CO, tobacco–onion intercropping; CW, tobacco–Chinese chive intercropping. Significant differences among treatments were determined at *P* < 0.05.

**Fig. S2 Clustered heatmap of rhizosphere soil metabolites in different chemical classes.**

Clustered heatmap showing the relative abundance patterns of rhizosphere soil metabolites in different chemical classes among treatments. A, Lipids and lipid-like molecules; B, Unclassified compounds; C, Phenylpropanoids and polyketides; D, Organoheterocyclic compounds; E, Organic acids and derivatives; F, Benzenoids; G, Organic oxygen compounds; H, Other compounds. C, flue-cured tobacco monoculture; CG, tobacco–garlic intercropping; CO, tobacco–onion intercropping; CW, tobacco–Chinese chive intercropping.


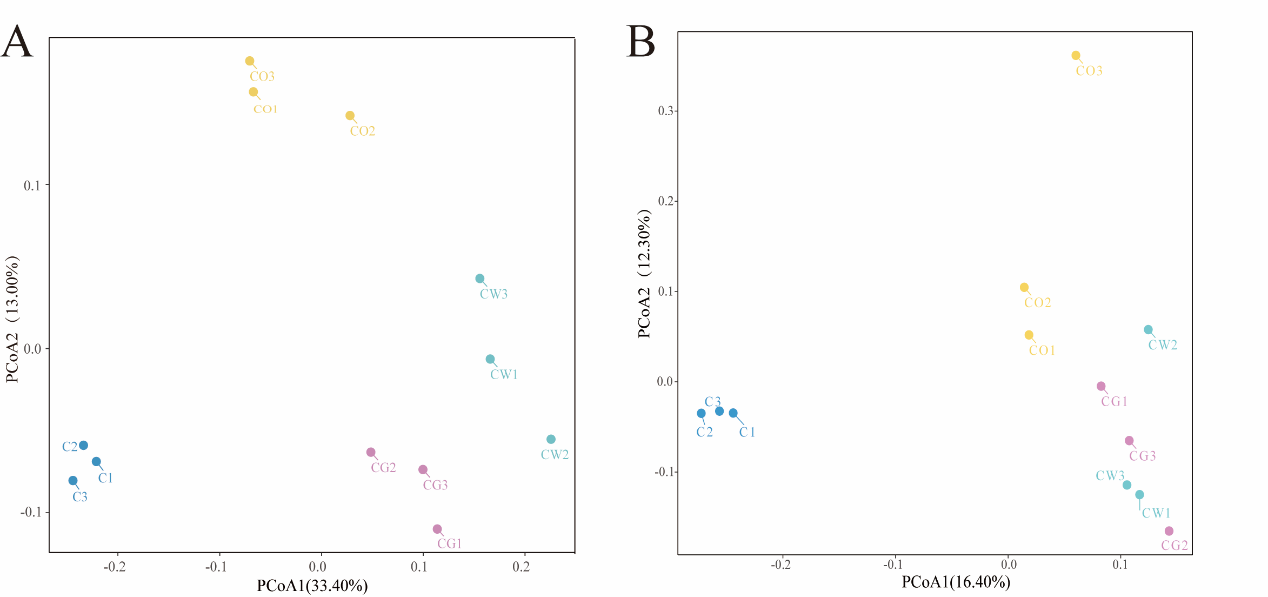


Fig.S1


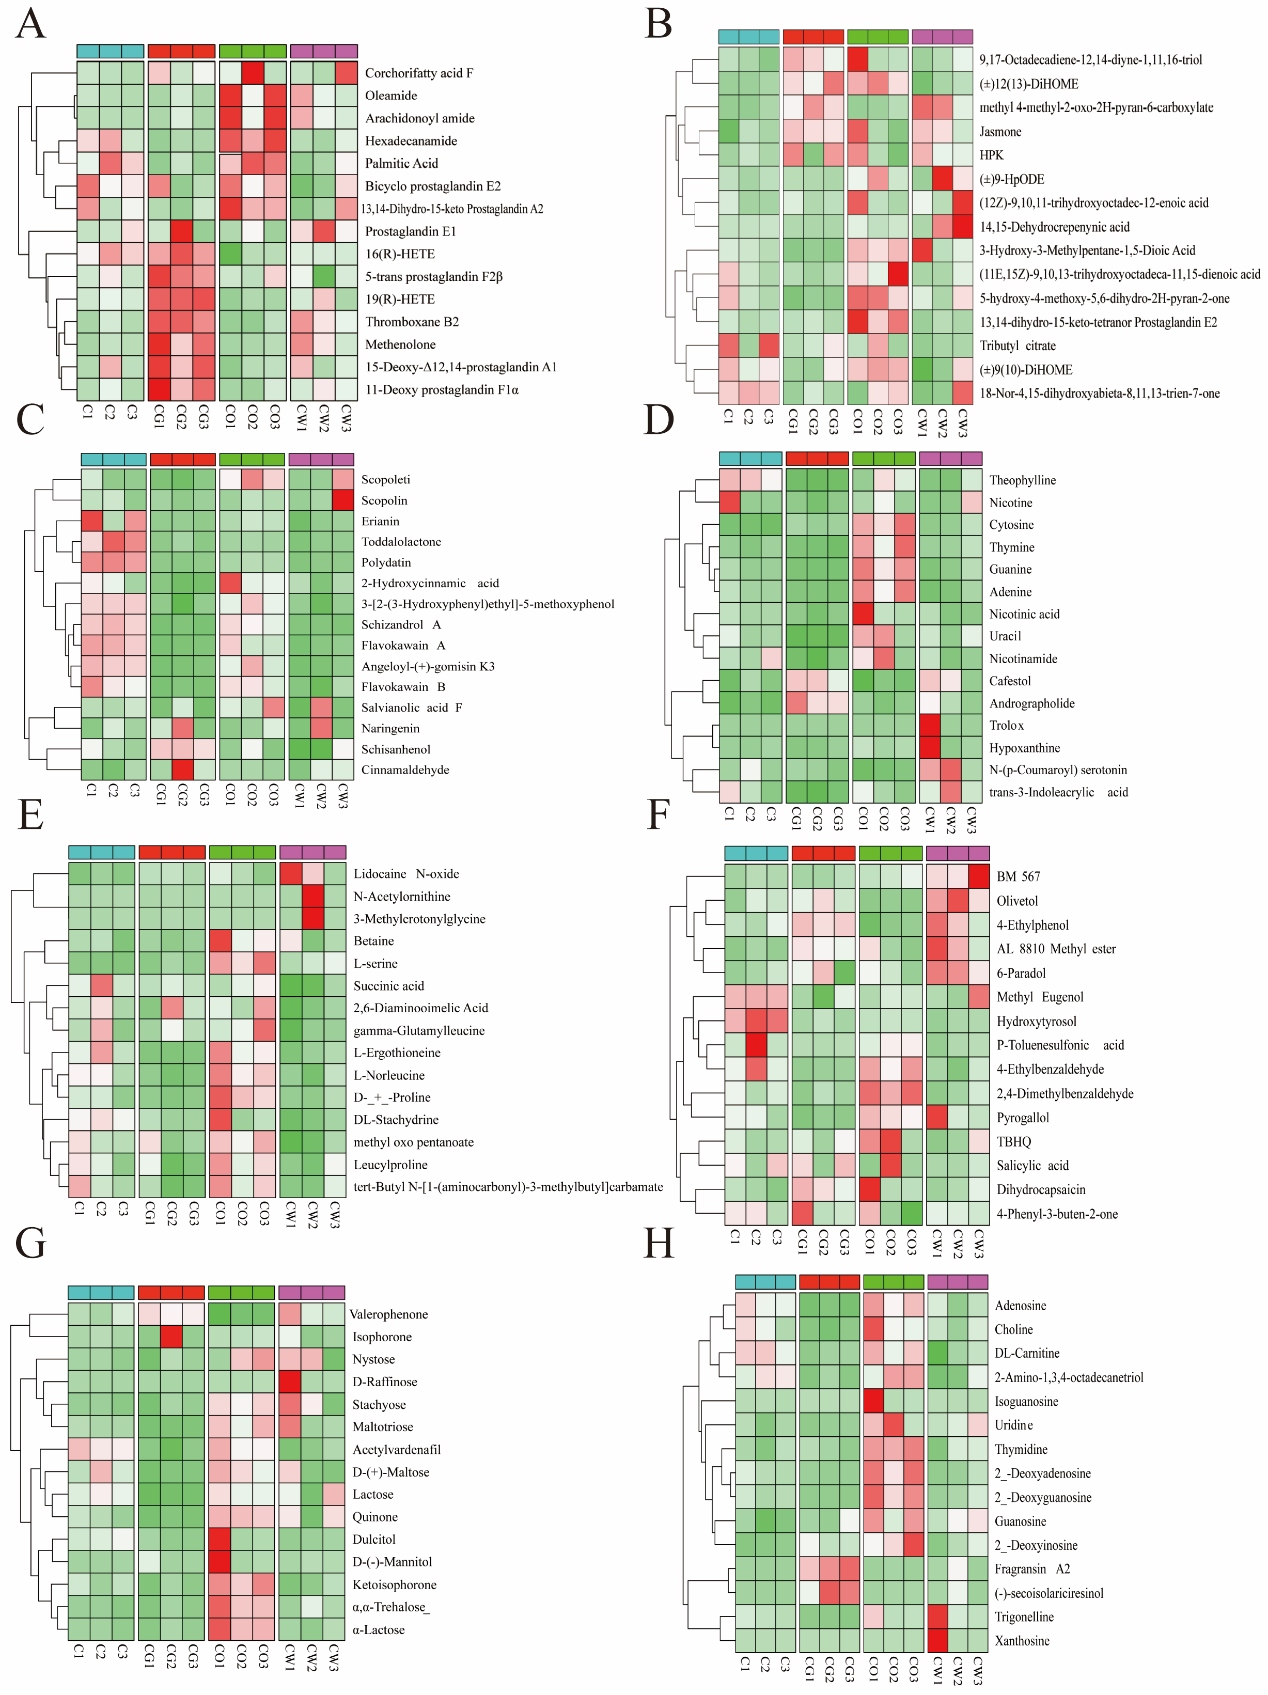


Fig.S2
